# Supplementary material for: Clustering of HClO4 with Brønsted (H2SO4, HClO4, HNO3) and Lewis acids BX3 (X = H, F, Cl, Br, OH): a DFT study
Source: Royal Society of Chemistry journal article supplement (doi:10.1039/c9nj04694a), 2019-01-01
Supplement: c9nj04694a1.pdf [file c9nj04694a1.pdf]

New Journal of Chemistry

## Supporting Information

### Clustering of HClO<sub>4</sub> with Brønsted (H<sub>2</sub>SO<sub>4</sub>, HClO<sub>4</sub>, HNO<sub>3</sub>) and Lewis acids BX<sub>3</sub> (X=H, F, Cl, Br, OH): A DFT study

Younes Valadbeigi<sup>†\*</sup> and Theo Kurtén<sup>‡\*</sup>

<sup>†</sup>Department of Chemistry, Faculty of Science, Imam Khomeini International University, Qazvin, Iran.

<sup>‡</sup>Institute for Atmospheric and Earth System Research/Chemistry, University of Helsinki, PO Box 55 (A. I. Virtasen Aukio 1), FI-00014 Helsinki, Finland.

| Content                                                                                                                                                                                                 | Page |
|---------------------------------------------------------------------------------------------------------------------------------------------------------------------------------------------------------|------|
| <b>Figure S1.</b> Comparison of relative energies of the isomers (BF <sub>3</sub> )HClO <sub>4</sub> -a and (BF <sub>3</sub> )HClO <sub>4</sub> -b                                                      | S2   |
| <b>Table S1.</b> The calculated relative abundance of (HClO <sub>4</sub> ) <sub>n</sub> clusters at 298 and 200 K                                                                                       | S3   |
| <b>Table S2.</b> The ΔH and ΔG values for formation of (HClO <sub>4</sub> ) <sub>1-3</sub> ClO <sub>4</sub> <sup>-</sup> clusters                                                                       | S4   |
| <b>Table S3.</b> The calculated relative abundance of (H <sub>2</sub> SO <sub>4</sub> ) <sub>n</sub> HClO <sub>4</sub> clusters at 298 and 200 K                                                        | S5   |
| <b>Table S4.</b> The calculated relative abundance of (HNO <sub>3</sub> ) <sub>n</sub> HClO <sub>4</sub> clusters at 298 and 200 K                                                                      | S6   |
| <b>Table S5.</b> The ΔH and ΔG values for formation (H <sub>2</sub> SO <sub>4</sub> ) <sub>1-3</sub> ClO <sub>4</sub> <sup>-</sup> and (HNO <sub>3</sub> ) <sub>1-3</sub> ClO <sub>4</sub> <sup>-</sup> | S7   |
| <b>Table S6.</b> The calculated values of $\rho(r)$ , $\nabla^2 \rho$ , $G(r)$ and $V(r)$                                                                                                               | S8   |
| <b>Figure S2.</b> Structures of (BX <sub>3</sub> )HClO <sub>4</sub> clusters                                                                                                                            | S8   |
| <b>Table S7.</b> The calculated relative abundance of (BH <sub>3</sub> ) <sub>n</sub> HClO <sub>4</sub> clusters at 298 and 200 K                                                                       | S9   |
| <b>Table S8.</b> The calculated relative abundance of (BF <sub>3</sub> ) <sub>n</sub> HClO <sub>4</sub> clusters at 298 and 200 K                                                                       | S10  |
| <b>Table S9.</b> The calculated relative abundance of (BCl <sub>3</sub> ) <sub>n</sub> HClO <sub>4</sub> clusters at 298 and 200 K                                                                      | S11  |
| <b>Table S10.</b> The calculated relative abundance of (BBr <sub>3</sub> ) <sub>n</sub> HClO <sub>4</sub> clusters at 298 and 200 K                                                                     | S12  |
| <b>Table S7.</b> The calculated relative abundance of (B(OH) <sub>3</sub> ) <sub>n</sub> HClO <sub>4</sub> clusters at 298 and 200 K                                                                    | S13  |

|                                                                                                                                                                                                      |        |       |                                                                                                                                                                                                      |        |       |                                                                                                                                        |        |       |
|------------------------------------------------------------------------------------------------------------------------------------------------------------------------------------------------------|--------|-------|------------------------------------------------------------------------------------------------------------------------------------------------------------------------------------------------------|--------|-------|----------------------------------------------------------------------------------------------------------------------------------------|--------|-------|
| 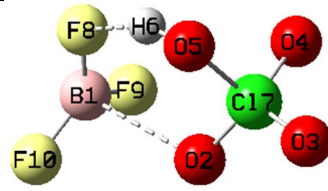 <p>(BF<sub>3</sub>)HClO<sub>4</sub>-a<br/> <b>0.0 (ωB97xD)</b><br/> <b>0.0 (MP2)</b><br/> <b>0.0 (CCSD(T))</b></p> |        |       |  <p>(BF<sub>3</sub>)HClO<sub>4</sub>-b<br/> <b>2.3 (ωB97xD)</b><br/> <b>1.2 (MP2)</b><br/> <b>2.5 (CCSD(T))</b></p> |        |       |  <p>(BF<sub>3</sub>)ClO<sub>4</sub><sup>-</sup></p> |        |       |
| Geometry                                                                                                                                                                                             | ωB97xD | MP2   | Geometry                                                                                                                                                                                             | ωB97xD | MP2   | Geometry                                                                                                                               | ωB97xD | MP2   |
| B1-F8                                                                                                                                                                                                | 1.347  | 1.358 | B6-F8                                                                                                                                                                                                | 1.324  | 1.337 | B5-F7                                                                                                                                  | 1.394  | 1.406 |
| B1-F10                                                                                                                                                                                               | 1.319  | 1.332 | B6-F9                                                                                                                                                                                                | 1.332  | 1.346 | B5-F8                                                                                                                                  | 1.389  | 1.402 |
| F8-H6                                                                                                                                                                                                | 1.970  | 2.021 | F9-H5                                                                                                                                                                                                | 2.788  | 2.723 | B5-O2                                                                                                                                  | 1.590  | 1.589 |
| O5-H6                                                                                                                                                                                                | 0.978  | 0.984 | O4-H5                                                                                                                                                                                                | 0.973  | 0.982 | O1-C16                                                                                                                                 | 1.478  | 1.481 |
| O5-C17                                                                                                                                                                                               | 1.678  | 1.712 | O4-C17                                                                                                                                                                                               | 1.708  | 1.773 | O2-C16                                                                                                                                 | 1.596  | 1.615 |
| O2-C17                                                                                                                                                                                               | 1.477  | 1.481 | O1-C17                                                                                                                                                                                               | 1.463  | 1.466 | O3-C16                                                                                                                                 | 1.475  | 1.477 |
| B1-O2                                                                                                                                                                                                | 2.562  | 2.485 | B6-O4                                                                                                                                                                                                | 2.620  | 2.398 | <B5-O2-C16                                                                                                                             | 120.8  | 118.3 |
| <O5-H6-F8                                                                                                                                                                                            | 153.9  | 150.8 | <H5-O4-B6                                                                                                                                                                                            | 105.0  | 107.1 | <F7-B5-O2                                                                                                                              | 100.7  | 100.9 |

**Figure S1.** Comparison of relative energies of the isomers (BF<sub>3</sub>)HClO<sub>4</sub>-a and (BF<sub>3</sub>)HClO<sub>4</sub>-b computed by ωB97xD, MP2, and CCSD(T) and their geometries obtained by ωB97xD and MP2. The CCSD(T) energies have been obtained by single point calculations on the MP2-optimized structures. The basis set aug-cc-pVDZ was used for all calculations. The relative energies, bond lengths, and angles are in kcal mol<sup>-1</sup>, Å, and degree, respectively.

**Table S1a.** The calculated relative abundance of (HClO<sub>4</sub>)<sub>n</sub> clusters at different pressure of HClO<sub>4</sub> and 298 K.

| Pressure (atm)    | %HClO <sub>4</sub> | %(HClO <sub>4</sub> ) <sub>2</sub> | %(HClO <sub>4</sub> ) <sub>3</sub> | %(HClO <sub>4</sub> ) <sub>4</sub> |
|-------------------|--------------------|------------------------------------|------------------------------------|------------------------------------|
| 10 <sup>-12</sup> | ~100               | 3.57 × 10 <sup>-12</sup>           | 1.3887 × 10 <sup>-26</sup>         | 2.0969 × 10 <sup>-42</sup>         |
| 10 <sup>-11</sup> | ~100               | 3.57 × 10 <sup>-11</sup>           | 1.3887 × 10 <sup>-24</sup>         | 2.0969 × 10 <sup>-39</sup>         |
| 10 <sup>-10</sup> | ~100               | 3.57 × 10 <sup>-10</sup>           | 1.3887 × 10 <sup>-22</sup>         | 2.0969 × 10 <sup>-36</sup>         |
| 10 <sup>-9</sup>  | ~100               | 3.57 × 10 <sup>-9</sup>            | 1.3887 × 10 <sup>-20</sup>         | 2.0969 × 10 <sup>-33</sup>         |
| 10 <sup>-8</sup>  | ~100               | 3.57 × 10 <sup>-8</sup>            | 1.3887 × 10 <sup>-18</sup>         | 2.0969 × 10 <sup>-30</sup>         |
| 10 <sup>-7</sup>  | ~100               | 3.57 × 10 <sup>-7</sup>            | 1.3887 × 10 <sup>-16</sup>         | 2.0969 × 10 <sup>-27</sup>         |
| 10 <sup>-6</sup>  | 99.9999            | 3.5699 × 10 <sup>-6</sup>          | 1.3887 × 10 <sup>-14</sup>         | 2.0969 × 10 <sup>-24</sup>         |
| 10 <sup>-5</sup>  | 99.9999            | 3.5699 × 10 <sup>-5</sup>          | 1.3887 × 10 <sup>-12</sup>         | 2.0969 × 10 <sup>-21</sup>         |
| 10 <sup>-4</sup>  | 99.9996            | 3.5699 × 10 <sup>-4</sup>          | 1.3887 × 10 <sup>-10</sup>         | 2.0969 × 10 <sup>-18</sup>         |
| 10 <sup>-3</sup>  | 99.9964            | 3.5698 × 10 <sup>-3</sup>          | 1.3886 × 10 <sup>-8</sup>          | 2.0969 × 10 <sup>-15</sup>         |
| 10 <sup>-2</sup>  | 99.9643            | 0.03568                            | 1.3882 × 10 <sup>-6</sup>          | 2.0962 × 10 <sup>-12</sup>         |
| 10 <sup>-1</sup>  | 99.6441            | 0.35573                            | 1.3837 × 10 <sup>-4</sup>          | 2.0895 × 10 <sup>-9</sup>          |
| 1                 | 96.5401            | 3.4464                             | 0.0134                             | 2.0244 × 10 <sup>-6</sup>          |

**Table S1b.** The calculated relative abundance of (HClO<sub>4</sub>)<sub>n</sub> clusters at different pressure of HClO<sub>4</sub> and 200 K.

| Pressure (atm)    | %HClO <sub>4</sub> | %(HClO <sub>4</sub> ) <sub>2</sub> | %(HClO <sub>4</sub> ) <sub>3</sub> | %(HClO <sub>4</sub> ) <sub>4</sub> |
|-------------------|--------------------|------------------------------------|------------------------------------|------------------------------------|
| 10 <sup>-12</sup> | ~100               | 9.2622 × 10 <sup>-9</sup>          | 9.2129 × 10 <sup>-21</sup>         | 1.6893 × 10 <sup>-34</sup>         |
| 10 <sup>-11</sup> | ~100               | 9.2622 × 10 <sup>-8</sup>          | 9.2129 × 10 <sup>-19</sup>         | 1.6893 × 10 <sup>-31</sup>         |
| 10 <sup>-10</sup> | ~100               | 9.2622 × 10 <sup>-7</sup>          | 9.2129 × 10 <sup>-17</sup>         | 1.6893 × 10 <sup>-28</sup>         |
| 10 <sup>-9</sup>  | ~100               | 9.2622 × 10 <sup>-6</sup>          | 9.2129 × 10 <sup>-15</sup>         | 1.6893 × 10 <sup>-25</sup>         |
| 10 <sup>-8</sup>  | 99.9999            | 9.2622 × 10 <sup>-5</sup>          | 9.2129 × 10 <sup>-13</sup>         | 1.6893 × 10 <sup>-22</sup>         |
| 10 <sup>-7</sup>  | 99.9991            | 9.2621 × 10 <sup>-4</sup>          | 9.2128 × 10 <sup>-11</sup>         | 1.6893 × 10 <sup>-19</sup>         |
| 10 <sup>-6</sup>  | 99.9907            | 9.2613 × 10 <sup>-3</sup>          | 9.2120 × 10 <sup>-9</sup>          | 1.6892 × 10 <sup>-16</sup>         |
| 10 <sup>-5</sup>  | 99.9074            | 9.2536 × 10 <sup>-2</sup>          | 9.2043 × 10 <sup>-7</sup>          | 1.6877 × 10 <sup>-13</sup>         |
| 10 <sup>-4</sup>  | 99.0822            | 0.91772                            | 9.1283 × 10 <sup>-5</sup>          | 1.6738 × 10 <sup>-10</sup>         |
| 10 <sup>-3</sup>  | 91.5229            | 8.4770                             | 8.4319 × 10 <sup>-3</sup>          | 1.5461 × 10 <sup>-7</sup>          |
| 10 <sup>-2</sup>  | 51.9149            | 48.0847                            | 0.47828                            | 8.7703 × 10 <sup>-5</sup>          |
| 10 <sup>-1</sup>  | 9.7425             | 90.2375                            | 8.9757                             | 1.6458 × 10 <sup>-2</sup>          |
| 1                 | 1.0488             | 97.1421                            | 96.6250                            | 1.7717                             |

**Table S2.** The calculated values  $\Delta H$  and  $\Delta G$  for formation of the conjugated bases  $(\text{HClO}_4)_{1-3}\text{ClO}_4^-$  in gas phase and at 298 K.

| reaction                                                                                                          | $\Delta H$ (kcal mol <sup>-1</sup> ) | $\Delta G$ (kcal mol <sup>-1</sup> ) |
|-------------------------------------------------------------------------------------------------------------------|--------------------------------------|--------------------------------------|
| $\text{HClO}_4 + \text{ClO}_4^- \rightarrow (\text{HClO}_4)\text{ClO}_4^-$                                        | -26.2                                | -15.6                                |
| $\text{HClO}_4 + (\text{HClO}_4)\text{ClO}_4^- \rightarrow (\text{HClO}_4)_2\text{ClO}_4^- \text{-a}$             | -34.0                                | -10.0                                |
| $\text{HClO}_4 + (\text{HClO}_4)\text{ClO}_4^- \rightarrow (\text{HClO}_4)_2\text{ClO}_4^- \text{-b}$             | -17.0                                | -10.7                                |
| $\text{HClO}_4 + (\text{HClO}_4)_2\text{ClO}_4^- \text{-a} \rightarrow (\text{HClO}_4)_3\text{ClO}_4^- \text{-a}$ | -10.6                                | 0.8                                  |
| $\text{HClO}_4 + (\text{HClO}_4)_2\text{ClO}_4^- \text{-a} \rightarrow (\text{HClO}_4)_3\text{ClO}_4^- \text{-b}$ | -13.4                                | -4.1                                 |
| $\text{HClO}_4 + (\text{HClO}_4)_2\text{ClO}_4^- \text{-a} \rightarrow (\text{HClO}_4)_3\text{ClO}_4^- \text{-c}$ | -11.3                                | 0.6                                  |
| $\text{HClO}_4 + (\text{HClO}_4)_2\text{ClO}_4^- \text{-b} \rightarrow (\text{HClO}_4)_3\text{ClO}_4^- \text{-a}$ | -10.8                                | 1.5                                  |
| $\text{HClO}_4 + (\text{HClO}_4)_2\text{ClO}_4^- \text{-b} \rightarrow (\text{HClO}_4)_3\text{ClO}_4^- \text{-b}$ | -13.6                                | -3.4                                 |
| $\text{HClO}_4 + (\text{HClO}_4)_2\text{ClO}_4^- \text{-b} \rightarrow (\text{HClO}_4)_3\text{ClO}_4^- \text{-c}$ | -11.5                                | 1.3                                  |

**Table S3a.** The calculated relative abundance of  $(\text{H}_2\text{SO}_4)_n\text{HClO}_4$  clusters at different pressure of  $\text{H}_2\text{SO}_4$  and 298 K.

| Pressure (atm) | % $\text{HClO}_4$       | % $(\text{H}_2\text{SO}_4)\text{HClO}_4$ | % $(\text{H}_2\text{SO}_4)_2\text{HClO}_4$ | % $(\text{H}_2\text{SO}_4)_3\text{HClO}_4$ |
|----------------|-------------------------|------------------------------------------|--------------------------------------------|--------------------------------------------|
| $10^{-12}$     | ~100                    | $1.53 \times 10^{-9}$                    | $4.5747 \times 10^{-19}$                   | $5.4896 \times 10^{-27}$                   |
| $10^{-11}$     | ~100                    | $1.53 \times 10^{-8}$                    | $4.5747 \times 10^{-17}$                   | $5.4896 \times 10^{-24}$                   |
| $10^{-10}$     | 99.9999                 | $1.5299 \times 10^{-7}$                  | $4.5746 \times 10^{-15}$                   | $5.4896 \times 10^{-21}$                   |
| $10^{-9}$      | 99.9999                 | $1.5299 \times 10^{-6}$                  | $4.5746 \times 10^{-13}$                   | $5.4896 \times 10^{-18}$                   |
| $10^{-8}$      | 99.9999                 | $1.5299 \times 10^{-5}$                  | $4.5746 \times 10^{-11}$                   | $5.4896 \times 10^{-15}$                   |
| $10^{-7}$      | 99.9998                 | $1.5299 \times 10^{-4}$                  | $4.5746 \times 10^{-9}$                    | $5.4896 \times 10^{-12}$                   |
| $10^{-6}$      | 99.9984                 | $1.5299 \times 10^{-3}$                  | $4.5746 \times 10^{-7}$                    | $5.4895 \times 10^{-9}$                    |
| $10^{-5}$      | 99.9846                 | 0.01529                                  | $4.5739 \times 10^{-5}$                    | $5.4887 \times 10^{-6}$                    |
| $10^{-4}$      | 99.8372                 | 0.15275                                  | $4.5672 \times 10^{-3}$                    | $5.4807 \times 10^{-3}$                    |
| $10^{-3}$      | 93.0431                 | 1.4235                                   | 0.4256                                     | 5.1077                                     |
| $10^{-2}$      | 1.7696                  | 0.2707                                   | 0.8095                                     | 97.1499                                    |
| $10^{-1}$      | $1.8200 \times 10^{-3}$ | $2.7846 \times 10^{-3}$                  | 0.0832                                     | 99.9121                                    |
| 1              | $1.8214 \times 10^{-6}$ | $2.7868 \times 10^{-5}$                  | $8.3326 \times 10^{-3}$                    | 99.9916                                    |

**Table S3b.** The calculated relative abundance of  $(\text{H}_2\text{SO}_4)_n\text{HClO}_4$  clusters at different pressure of  $\text{H}_2\text{SO}_4$  and 200 K.

| Pressure (atm) | % $\text{HClO}_4$        | % $(\text{H}_2\text{SO}_4)\text{HClO}_4$ | % $(\text{H}_2\text{SO}_4)_2\text{HClO}_4$ | % $(\text{H}_2\text{SO}_4)_3\text{HClO}_4$ |
|----------------|--------------------------|------------------------------------------|--------------------------------------------|--------------------------------------------|
| $10^{-12}$     | 99.9999                  | $1.7857 \times 10^{-4}$                  | $1.1122 \times 10^{-8}$                    | $8.1518 \times 10^{-11}$                   |
| $10^{-11}$     | 99.9982                  | $1.7857 \times 10^{-3}$                  | $1.1122 \times 10^{-6}$                    | $8.1517 \times 10^{-8}$                    |
| $10^{-10}$     | 99.9819                  | $1.7854 \times 10^{-2}$                  | $1.1120 \times 10^{-4}$                    | $8.1503 \times 10^{-5}$                    |
| $10^{-9}$      | 99.7295                  | 0.17809                                  | $1.1092 \times 10^{-2}$                    | $8.1297 \times 10^{-2}$                    |
| $10^{-8}$      | 54.2251                  | 0.9683                                   | 0.6031                                     | 44.2034                                    |
| $10^{-7}$      | 0.1223                   | 0.02184                                  | 0.13606                                    | 99.7197                                    |
| $10^{-6}$      | $1.2265 \times 10^{-4}$  | $2.1903 \times 10^{-4}$                  | $1.3642 \times 10^{-2}$                    | 99.9860                                    |
| $10^{-5}$      | $1.2267 \times 10^{-7}$  | $2.1905 \times 10^{-6}$                  | $1.3643 \times 10^{-3}$                    | 99.9986                                    |
| $10^{-4}$      | $1.2267 \times 10^{-10}$ | $2.1906 \times 10^{-8}$                  | $1.3644 \times 10^{-4}$                    | 99.9998                                    |
| $10^{-3}$      | $1.2267 \times 10^{-13}$ | $2.1906 \times 10^{-10}$                 | $1.3644 \times 10^{-5}$                    | 99.9999                                    |
| $10^{-2}$      | $1.2267 \times 10^{-16}$ | $2.1906 \times 10^{-12}$                 | $1.3644 \times 10^{-6}$                    | 99.9999                                    |
| $10^{-1}$      | $1.2267 \times 10^{-19}$ | $2.1906 \times 10^{-14}$                 | $1.3644 \times 10^{-7}$                    | ~100                                       |
| 1              | $1.2267 \times 10^{-22}$ | $2.1906 \times 10^{-16}$                 | $1.3644 \times 10^{-8}$                    | ~100                                       |

**Table S4a.** The calculated relative abundance of  $(\text{HNO}_3)_n\text{HClO}_4$  clusters at different pressure of  $\text{HNO}_3$  and 298 K.

| Pressure (atm) | % $\text{HClO}_4$ | %( $\text{HNO}_3$ ) $\text{HClO}_4$ | %( $\text{HNO}_3$ ) $_2\text{HClO}_4$ | %( $\text{HNO}_3$ ) $_3\text{HClO}_4$ |
|----------------|-------------------|-------------------------------------|---------------------------------------|---------------------------------------|
| $10^{-12}$     | ~100              | $6.69 \times 10^{-12}$              | $6.3889 \times 10^{-26}$              | $1.6547 \times 10^{-38}$              |
| $10^{-11}$     | ~100              | $6.69 \times 10^{-11}$              | $6.3889 \times 10^{-24}$              | $1.6547 \times 10^{-35}$              |
| $10^{-10}$     | ~100              | $6.69 \times 10^{-10}$              | $6.3889 \times 10^{-22}$              | $1.6547 \times 10^{-32}$              |
| $10^{-9}$      | ~100              | $6.69 \times 10^{-9}$               | $6.3889 \times 10^{-20}$              | $1.6547 \times 10^{-29}$              |
| $10^{-8}$      | ~100              | $6.69 \times 10^{-8}$               | $6.3889 \times 10^{-18}$              | $1.6547 \times 10^{-26}$              |
| $10^{-7}$      | ~100              | $6.6899 \times 10^{-7}$             | $6.3889 \times 10^{-16}$              | $1.6547 \times 10^{-23}$              |
| $10^{-6}$      | 99.9999           | $6.6899 \times 10^{-6}$             | $6.3889 \times 10^{-14}$              | $1.6547 \times 10^{-20}$              |
| $10^{-5}$      | 99.9999           | $6.6899 \times 10^{-5}$             | $6.3889 \times 10^{-12}$              | $1.6547 \times 10^{-17}$              |
| $10^{-4}$      | 99.9993           | $6.6899 \times 10^{-4}$             | $6.3889 \times 10^{-10}$              | $1.6547 \times 10^{-14}$              |
| $10^{-3}$      | 99.9933           | $6.6895 \times 10^{-3}$             | $6.3885 \times 10^{-8}$               | $1.6546 \times 10^{-11}$              |
| $10^{-2}$      | 99.9331           | $6.6855 \times 10^{-2}$             | $6.3846 \times 10^{-6}$               | $1.6536 \times 10^{-8}$               |
| $10^{-1}$      | 99.3347           | 0.6645                              | $6.3464 \times 10^{-4}$               | $1.6437 \times 10^{-5}$               |
| 1              | 93.6588           | 6.2657                              | $5.9838 \times 10^{-2}$               | $1.5498 \times 10^{-2}$               |

**Table S4b.** The calculated relative abundance of  $(\text{HNO}_3)_n\text{HClO}_4$  clusters at different pressure of  $\text{HNO}_3$  and 200 K.

| Pressure (atm) | % $\text{HClO}_4$       | %( $\text{HNO}_3$ ) $\text{HClO}_4$ | %( $\text{HNO}_3$ ) $_2\text{HClO}_4$ | %( $\text{HNO}_3$ ) $_3\text{HClO}_4$ |
|----------------|-------------------------|-------------------------------------|---------------------------------------|---------------------------------------|
| $10^{-12}$     | ~100                    | $1.1475 \times 10^{-8}$             | $8.7993 \times 10^{-21}$              | $1.8562 \times 10^{-30}$              |
| $10^{-11}$     | ~100                    | $1.1475 \times 10^{-7}$             | $8.7993 \times 10^{-19}$              | $1.8562 \times 10^{-27}$              |
| $10^{-10}$     | ~100                    | $1.1475 \times 10^{-6}$             | $8.7993 \times 10^{-17}$              | $1.8562 \times 10^{-24}$              |
| $10^{-9}$      | ~100                    | $1.1475 \times 10^{-5}$             | $8.7993 \times 10^{-15}$              | $1.8562 \times 10^{-21}$              |
| $10^{-8}$      | 99.9999                 | $1.1475 \times 10^{-4}$             | $8.7993 \times 10^{-13}$              | $1.8562 \times 10^{-18}$              |
| $10^{-7}$      | 99.9988                 | $1.1475 \times 10^{-3}$             | $8.7992 \times 10^{-11}$              | $1.8562 \times 10^{-15}$              |
| $10^{-6}$      | 99.9885                 | $1.1474 \times 10^{-2}$             | $8.7983 \times 10^{-9}$               | $1.8560 \times 10^{-12}$              |
| $10^{-5}$      | 99.8853                 | 0.11462                             | $8.7892 \times 10^{-7}$               | $1.8541 \times 10^{-9}$               |
| $10^{-4}$      | 98.8643                 | 1.1345                              | $8.6995 \times 10^{-5}$               | $1.8351 \times 10^{-6}$               |
| $10^{-3}$      | 89.6969                 | 10.2935                             | $7.8927 \times 10^{-3}$               | $1.6650 \times 10^{-3}$               |
| $10^{-2}$      | 45.9751                 | 52.7638                             | 0.40457                               | 0.85347                               |
| $10^{-1}$      | 3.1329                  | 35.9537                             | 2.7568                                | 58.1564                               |
| 1              | $5.3256 \times 10^{-3}$ | 0.6115                              | 0.4688                                | 98.9142                               |

**Table S5.** The calculated values  $\Delta H$  and  $\Delta G$  for formation of the conjugated bases  $(\text{H}_2\text{SO}_4)_{1-3}\text{ClO}_4^-$  and  $(\text{HNO}_3)_{1-3}\text{ClO}_4^-$  in gas phase and at 298 K.

| reaction                                                                                                                        | $\Delta H$ (kcal mol <sup>-1</sup> ) | $\Delta G$ (kcal mol <sup>-1</sup> ) |
|---------------------------------------------------------------------------------------------------------------------------------|--------------------------------------|--------------------------------------|
| $\text{H}_2\text{SO}_4 + \text{ClO}_4^- \rightarrow (\text{H}_2\text{SO}_4)\text{ClO}_4^-$ -a                                   | -31.8                                | -20.4                                |
| $\text{H}_2\text{SO}_4 + \text{ClO}_4^- \rightarrow (\text{H}_2\text{SO}_4)\text{ClO}_4^-$ -b                                   | -30.1                                | -19.7                                |
| $\text{H}_2\text{SO}_4 + (\text{H}_2\text{SO}_4)\text{ClO}_4^-$ -a $\rightarrow$ $(\text{H}_2\text{SO}_4)_2\text{ClO}_4^-$ -a   | -20.0                                | -7.4                                 |
| $\text{H}_2\text{SO}_4 + (\text{H}_2\text{SO}_4)\text{ClO}_4^-$ -a $\rightarrow$ $(\text{H}_2\text{SO}_4)_2\text{ClO}_4^-$ -b   | -18.6                                | -7.5                                 |
| $\text{H}_2\text{SO}_4 + (\text{H}_2\text{SO}_4)\text{ClO}_4^-$ -a $\rightarrow$ $(\text{H}_2\text{SO}_4)_2\text{ClO}_4^-$ -c   | -23.2                                | -12.4                                |
| $\text{H}_2\text{SO}_4 + (\text{H}_2\text{SO}_4)\text{ClO}_4^-$ -a $\rightarrow$ $(\text{H}_2\text{SO}_4)_2\text{ClO}_4^-$ -d   | -20.9                                | -10.9                                |
| $\text{H}_2\text{SO}_4 + (\text{H}_2\text{SO}_4)\text{ClO}_4^-$ -a $\rightarrow$ $(\text{H}_2\text{SO}_4)_2\text{ClO}_4^-$ -e   | -22.7                                | -11.8                                |
| $\text{H}_2\text{SO}_4 + (\text{H}_2\text{SO}_4)_2\text{ClO}_4^-$ -c $\rightarrow$ $(\text{H}_2\text{SO}_4)_3\text{ClO}_4^-$ -a | -16.7                                | -6.5                                 |
| $\text{H}_2\text{SO}_4 + (\text{H}_2\text{SO}_4)_2\text{ClO}_4^-$ -c $\rightarrow$ $(\text{H}_2\text{SO}_4)_3\text{ClO}_4^-$ -b | -17.2                                | -4.0                                 |
| $\text{H}_2\text{SO}_4 + (\text{H}_2\text{SO}_4)_2\text{ClO}_4^-$ -c $\rightarrow$ $(\text{H}_2\text{SO}_4)_3\text{ClO}_4^-$ -c | -17.6                                | -3.4                                 |
| $\text{H}_2\text{SO}_4 + (\text{H}_2\text{SO}_4)_2\text{ClO}_4^-$ -c $\rightarrow$ $(\text{H}_2\text{SO}_4)_3\text{ClO}_4^-$ -d | -19.3                                | -5.2                                 |
| $\text{H}_2\text{SO}_4 + (\text{H}_2\text{SO}_4)_2\text{ClO}_4^-$ -c $\rightarrow$ $(\text{H}_2\text{SO}_4)_3\text{ClO}_4^-$ -e | -17.9                                | -5.3                                 |
| $\text{H}_2\text{SO}_4 + (\text{H}_2\text{SO}_4)_2\text{ClO}_4^-$ -c $\rightarrow$ $(\text{H}_2\text{SO}_4)_3\text{ClO}_4^-$ -f | -20.8                                | -7.1                                 |
| $\text{H}_2\text{SO}_4 + (\text{H}_2\text{SO}_4)_2\text{ClO}_4^-$ -c $\rightarrow$ $(\text{H}_2\text{SO}_4)_3\text{ClO}_4^-$ -g | -11.9                                | 0.9                                  |
| $\text{H}_2\text{SO}_4 + (\text{H}_2\text{SO}_4)_2\text{ClO}_4^-$ -c $\rightarrow$ $(\text{H}_2\text{SO}_4)_3\text{ClO}_4^-$ -h | -7.6                                 | 5.5                                  |
| $\text{HNO}_3 + \text{ClO}_4^- \rightarrow (\text{HNO}_3)\text{ClO}_4^-$                                                        | -20.8                                | -12.4                                |
| $\text{HNO}_3 + (\text{HNO}_3)\text{ClO}_4^- \rightarrow (\text{HNO}_3)_2\text{ClO}_4^-$ -a                                     | -15.6                                | -6.5                                 |
| $\text{HNO}_3 + (\text{HNO}_3)\text{ClO}_4^- \rightarrow (\text{HNO}_3)_2\text{ClO}_4^-$ -b                                     | -13.5                                | -4.8                                 |
| $\text{HNO}_3 + (\text{HNO}_3)_2\text{ClO}_4^-$ -a $\rightarrow$ $(\text{HNO}_3)_3\text{ClO}_4^-$ -a                            | -11.6                                | -2.3                                 |
| $\text{HNO}_3 + (\text{HNO}_3)_2\text{ClO}_4^-$ -a $\rightarrow$ $(\text{HNO}_3)_3\text{ClO}_4^-$ -b                            | -11.5                                | -2.0                                 |
| $\text{HNO}_3 + (\text{HNO}_3)_2\text{ClO}_4^-$ -a $\rightarrow$ $(\text{HNO}_3)_3\text{ClO}_4^-$ -c                            | -8.3                                 | 2.6                                  |
| $\text{HNO}_3 + (\text{HNO}_3)_2\text{ClO}_4^-$ -a $\rightarrow$ $(\text{HNO}_3)_3\text{ClO}_4^-$ -d                            | -7.0                                 | 3.9                                  |

**Table S6.** The calculated values of  $\rho(r)$ ,  $\nabla^2\rho$ ,  $G(r)$  and  $V(r)$  at the bond critical point (BCP) for interaction of  $\text{HClO}_4$  and  $\text{BX}_3$ .

| Compound                               | bond    | $\rho(r)$ | $\nabla^2\rho(r)$ | $G(r)$   | $V(r)$    |
|----------------------------------------|---------|-----------|-------------------|----------|-----------|
| $(\text{BH}_3)\text{HClO}_4\text{-a}$  | H3-H9   | 0.039624  | 0.069063          | 0.022123 | -0.026981 |
| $(\text{BH}_3)\text{HClO}_4\text{-a}$  | B1-O5   | 0.064550  | 0.162759          | 0.077793 | -0.114896 |
| $(\text{BH}_3)\text{HClO}_4\text{-b}$  | B6-O4   | 0.065621  | 0.108933          | 0.061258 | -0.095283 |
| $(\text{BH}_3)\text{ClO}_4^-$          | B5-O2   | 0.087478  | 0.476485          | 0.158603 | -0.198085 |
| $(\text{BF}_3)\text{HClO}_4\text{-a}$  | F8-H6   | 0.019318  | 0.070600          | 0.016680 | -0.015711 |
| $(\text{BF}_3)\text{HClO}_4\text{-a}$  | F8-O2   | 0.014527  | 0.046764          | 0.044617 | -0.011544 |
| $(\text{BF}_3)\text{HClO}_4\text{-b}$  | F9-O4   | 0.013332  | 0.045344          | 0.010947 | -0.010559 |
| $(\text{BF}_3)\text{ClO}_4^-$          | B5-O2   | 0.107553  | 0.340022          | 0.153674 | -0.222343 |
| $(\text{BCl}_3)\text{HClO}_4\text{-a}$ | Cl9-H6  | 0.014827  | 0.040783          | 0.009002 | -0.007809 |
| $(\text{BCl}_3)\text{HClO}_4\text{-a}$ | Cl9-O2  | 0.005983  | 0.020207          | 0.004221 | -0.003391 |
| $(\text{BCl}_3)\text{HClO}_4\text{-b}$ | Cl9-O2  | 0.002224  | 0.008688          | 0.001658 | -0.001144 |
| $(\text{BCl}_3)\text{HClO}_4\text{-b}$ | Cl9-O3  | 0.002782  | 0.010021          | 0.001981 | -0.001455 |
| $(\text{BCl}_3)\text{HClO}_4\text{-b}$ | Cl10-O4 | 0.006799  | 0.022445          | 0.004771 | -0.003930 |
| $(\text{BCl}_3)\text{ClO}_4^-$         | B5-O2   | 0.128271  | 0.524358          | 0.207038 | -0.282986 |
| $(\text{BBr}_3)\text{HClO}_4\text{-a}$ | Br8-H6  | 0.013704  | 0.032488          | 0.007442 | -0.006761 |
| $(\text{BBr}_3)\text{HClO}_4\text{-a}$ | Br8-O2  | 0.004951  | 0.015818          | 0.003251 | -0.002546 |
| $(\text{BBr}_3)\text{HClO}_4\text{-b}$ | Br9-O3  | 0.003487  | 0.011232          | 0.002301 | -0.001793 |
| $(\text{BBr}_3)\text{HClO}_4\text{-b}$ | Br8-O4  | 0.006453  | 0.020944          | 0.004351 | -0.003466 |
| $(\text{BBr}_3)\text{ClO}_4^-$         | Br7-O3  | 0.008572  | 0.028126          | 0.006249 | -0.005467 |
| $(\text{BBr}_3)\text{ClO}_4^-$         | B5-O2   | 0.134829  | 0.598452          | 0.226813 | -0.304013 |

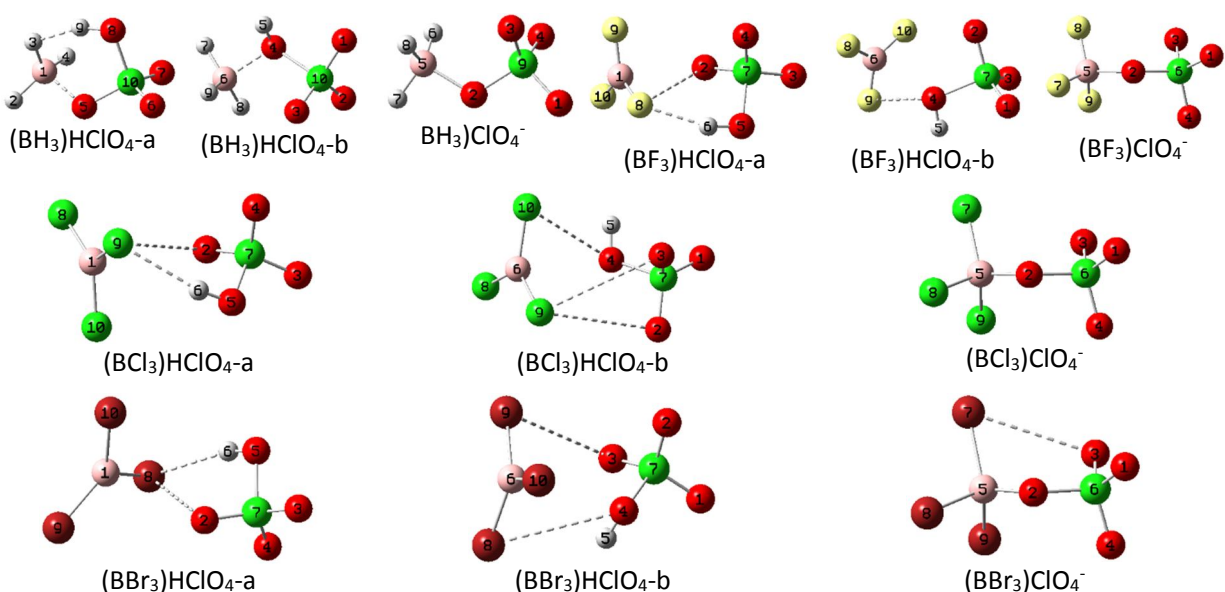

**Figure S2.** Numbering of atoms of  $(\text{BX}_3)\text{HClO}_4$  used in Table S6. The dotted lines are interactions predicted by AIM.



**Table S7a.** The calculated relative abundance of  $(\text{BH}_3)_n\text{HClO}_4$  clusters at different pressure of  $\text{BH}_3$  and 298 K.

| Pressure (atm) | % $\text{HClO}_4$ | % $(\text{BH}_3)\text{HClO}_4$ | % $(\text{BH}_3)_2\text{HClO}_4$ | % $(\text{BH}_3)_3\text{HClO}_4$ |
|----------------|-------------------|--------------------------------|----------------------------------|----------------------------------|
| $10^{-12}$     | ~100              | $8.45 \times 10^{-14}$         | $6.54 \times 10^{-22}$           | $9.22 \times 10^{-38}$           |
| $10^{-11}$     | ~100              | $8.45 \times 10^{-13}$         | $6.54 \times 10^{-20}$           | $9.22 \times 10^{-35}$           |
| $10^{-10}$     | ~100              | $8.45 \times 10^{-12}$         | $6.54 \times 10^{-18}$           | $9.22 \times 10^{-32}$           |
| $10^{-9}$      | ~100              | $8.45 \times 10^{-10}$         | $6.54 \times 10^{-16}$           | $9.22 \times 10^{-29}$           |
| $10^{-8}$      | ~100              | $8.45 \times 10^{-12}$         | $6.54 \times 10^{-14}$           | $9.22 \times 10^{-26}$           |
| $10^{-7}$      | ~100              | $8.45 \times 10^{-9}$          | $6.54 \times 10^{-12}$           | $9.22 \times 10^{-23}$           |
| $10^{-6}$      | 99.9999           | $8.45 \times 10^{-8}$          | $6.5403 \times 10^{-10}$         | $9.2218 \times 10^{-20}$         |
| $10^{-5}$      | 99.9999           | $8.45 \times 10^{-7}$          | $6.5403 \times 10^{-8}$          | $9.2218 \times 10^{-17}$         |
| $10^{-4}$      | 99.9999           | $8.45 \times 10^{-6}$          | $6.5403 \times 10^{-6}$          | $9.2218 \times 10^{-14}$         |
| $10^{-3}$      | 99.9992           | $8.4499 \times 10^{-5}$        | $6.5402 \times 10^{-4}$          | $9.2211 \times 10^{-11}$         |
| $10^{-2}$      | 99.9337           | $8.4499 \times 10^{-4}$        | 0.06535                          | $9.2157 \times 10^{-8}$          |
| $10^{-1}$      | 93.8536           | $7.9306 \times 10^{-3}$        | 6.1383                           | $8.6550 \times 10^{-5}$          |
| 1              | 13.2589           | 0.01120                        | 86.7176                          | 0.01222                          |

**Table S7b.** The calculated relative abundance of  $(\text{BH}_3)_n\text{HClO}_4$  clusters at different pressure of  $\text{BH}_3$  and 200 K.

| Pressure (atm) | % $\text{HClO}_4$       | % $(\text{BH}_3)\text{HClO}_4$ | % $(\text{BH}_3)_2\text{HClO}_4$ | % $(\text{BH}_3)_3\text{HClO}_4$ |
|----------------|-------------------------|--------------------------------|----------------------------------|----------------------------------|
| $10^{-12}$     | ~100                    | $1.9892 \times 10^{-11}$       | $1.5448 \times 10^{-13}$         | $5.9649 \times 10^{-28}$         |
| $10^{-11}$     | ~100                    | $1.9892 \times 10^{-10}$       | $1.5448 \times 10^{-11}$         | $5.9649 \times 10^{-25}$         |
| $10^{-10}$     | ~100                    | $1.9892 \times 10^{-9}$        | $1.5448 \times 10^{-9}$          | $5.9649 \times 10^{-22}$         |
| $10^{-9}$      | ~100                    | $1.9892 \times 10^{-8}$        | $1.5448 \times 10^{-7}$          | $5.9649 \times 10^{-19}$         |
| $10^{-8}$      | ~100                    | $1.9892 \times 10^{-7}$        | $1.5448 \times 10^{-5}$          | $5.9649 \times 10^{-16}$         |
| $10^{-7}$      | 99.9984                 | $1.9892 \times 10^{-6}$        | $1.5448 \times 10^{-3}$          | $5.9648 \times 10^{-13}$         |
| $10^{-6}$      | 99.8457                 | $1.9861 \times 10^{-5}$        | 0.1542                           | $5.9557 \times 10^{-10}$         |
| $10^{-5}$      | 86.6184                 | $1.7230 \times 10^{-4}$        | 13.3814                          | $5.1667 \times 10^{-7}$          |
| $10^{-4}$      | 6.0795                  | $1.2093 \times 10^{-4}$        | 93.9203                          | $3.6263 \times 10^{-5}$          |
| $10^{-3}$      | $6.4688 \times 10^{-2}$ | $1.2868 \times 10^{-5}$        | 99.9349                          | $3.8585 \times 10^{-4}$          |
| $10^{-2}$      | $6.4727 \times 10^{-4}$ | $1.2875 \times 10^{-6}$        | 99.9954                          | $3.8609 \times 10^{-3}$          |
| $10^{-1}$      | $6.4705 \times 10^{-6}$ | $1.2871 \times 10^{-7}$        | 99.9613                          | $3.8596 \times 10^{-2}$          |
| 1              | $6.4481 \times 10^{-8}$ | $1.2826 \times 10^{-8}$        | 99.6153                          | 0.3846                           |

**Table S8a.** The calculated relative abundance of  $(\text{BF}_3)_n\text{HClO}_4$  clusters at different pressure of  $\text{BF}_3$  and 298 K.

| Pressure (atm) | % $\text{HClO}_4$ | % $(\text{BF}_3)\text{HClO}_4$ | % $(\text{BF}_3)_2\text{HClO}_4$ | % $(\text{BF}_3)_3\text{HClO}_4$ |
|----------------|-------------------|--------------------------------|----------------------------------|----------------------------------|
| $10^{-12}$     | ~100              | $3.56 \times 10^{-14}$         | $1.8405 \times 10^{-30}$         | $1.2423 \times 10^{-47}$         |
| $10^{-11}$     | ~100              | $3.56 \times 10^{-13}$         | $1.8405 \times 10^{-28}$         | $1.2423 \times 10^{-44}$         |
| $10^{-10}$     | ~100              | $3.56 \times 10^{-12}$         | $1.8405 \times 10^{-26}$         | $1.2423 \times 10^{-41}$         |
| $10^{-9}$      | ~100              | $3.56 \times 10^{-11}$         | $1.8405 \times 10^{-24}$         | $1.2423 \times 10^{-38}$         |
| $10^{-8}$      | ~100              | $3.56 \times 10^{-10}$         | $1.8405 \times 10^{-22}$         | $1.2423 \times 10^{-35}$         |
| $10^{-7}$      | ~100              | $3.56 \times 10^{-9}$          | $1.8405 \times 10^{-20}$         | $1.2423 \times 10^{-32}$         |
| $10^{-6}$      | ~100              | $3.56 \times 10^{-8}$          | $1.8405 \times 10^{-18}$         | $1.2423 \times 10^{-29}$         |
| $10^{-5}$      | 99.9999           | $3.56 \times 10^{-7}$          | $1.8405 \times 10^{-16}$         | $1.2423 \times 10^{-26}$         |
| $10^{-4}$      | 99.9999           | $3.5599 \times 10^{-6}$        | $1.8405 \times 10^{-14}$         | $1.2423 \times 10^{-23}$         |
| $10^{-3}$      | 99.9999           | $3.5599 \times 10^{-5}$        | $1.8405 \times 10^{-12}$         | $1.2423 \times 10^{-20}$         |
| $10^{-2}$      | 99.9996           | $3.5599 \times 10^{-4}$        | $1.8405 \times 10^{-10}$         | $1.2423 \times 10^{-17}$         |
| $10^{-1}$      | 99.9964           | $3.5598 \times 10^{-3}$        | $1.8404 \times 10^{-8}$          | $1.2423 \times 10^{-14}$         |
| 1              | 99.9644           | 0.03558                        | $1.8398 \times 10^{-6}$          | $1.2419 \times 10^{-11}$         |
| 50             | 98.2466           | 1.7487                         | $4.5206 \times 10^{-3}$          | $1.5257 \times 10^{-6}$          |

**Table S8b.** The calculated relative abundance of  $(\text{BF}_3)_n\text{HClO}_4$  clusters at different pressure of  $\text{BF}_3$  and 200 K.

| Pressure (atm) | % $\text{HClO}_4$ | % $(\text{BF}_3)\text{HClO}_4$ | % $(\text{BF}_3)_2\text{HClO}_4$ | % $(\text{BF}_3)_3\text{HClO}_4$ |
|----------------|-------------------|--------------------------------|----------------------------------|----------------------------------|
| $10^{-12}$     | ~100              | $1.1501 \times 10^{-12}$       | $5.1118 \times 10^{-28}$         | $1.9612 \times 10^{-44}$         |
| $10^{-11}$     | ~100              | $1.1501 \times 10^{-11}$       | $5.1118 \times 10^{-26}$         | $1.9612 \times 10^{-41}$         |
| $10^{-10}$     | ~100              | $1.1501 \times 10^{-10}$       | $5.1118 \times 10^{-24}$         | $1.9612 \times 10^{-38}$         |
| $10^{-9}$      | ~100              | $1.1501 \times 10^{-9}$        | $5.1118 \times 10^{-22}$         | $1.9612 \times 10^{-35}$         |
| $10^{-8}$      | ~100              | $1.1501 \times 10^{-8}$        | $5.1118 \times 10^{-20}$         | $1.9612 \times 10^{-32}$         |
| $10^{-7}$      | ~100              | $1.1501 \times 10^{-7}$        | $5.1118 \times 10^{-18}$         | $1.9612 \times 10^{-29}$         |
| $10^{-6}$      | ~100              | $1.1501 \times 10^{-6}$        | $5.1118 \times 10^{-16}$         | $1.9612 \times 10^{-26}$         |
| $10^{-5}$      | ~100              | $1.1501 \times 10^{-5}$        | $5.1118 \times 10^{-14}$         | $1.9612 \times 10^{-23}$         |
| $10^{-4}$      | 99.9999           | $1.1501 \times 10^{-4}$        | $5.1118 \times 10^{-12}$         | $1.9612 \times 10^{-20}$         |
| $10^{-3}$      | 99.9999           | $1.1501 \times 10^{-3}$        | $5.1117 \times 10^{-10}$         | $1.9612 \times 10^{-17}$         |
| $10^{-2}$      | 99.9884           | $1.1500 \times 10^{-2}$        | $5.1112 \times 10^{-8}$          | $1.9612 \times 10^{-14}$         |
| $10^{-1}$      | 99.8851           | 0.11488                        | $5.1059 \times 10^{-6}$          | $1.9589 \times 10^{-11}$         |
| 1              | 98.8624           | 1.1370                         | $5.0536 \times 10^{-6}$          | $1.9389 \times 10^{-8}$          |
| 50             | 62.9773           | 36.2162                        | 0.80482                          | $1.5439 \times 10^{-3}$          |

**Table S9a.** The calculated relative abundance of  $(\text{BCl}_3)_n\text{HClO}_4$  clusters at different pressure of  $\text{BCl}_3$  and 298 K.

| Pressure (atm) | % $\text{HClO}_4$ | % $(\text{BCl}_3)\text{HClO}_4$ | % $(\text{BCl}_3)_2\text{HClO}_4$ | % $(\text{BCl}_3)_3\text{HClO}_4$ |
|----------------|-------------------|---------------------------------|-----------------------------------|-----------------------------------|
| $10^{-12}$     | ~100              | $9.74 \times 10^{-15}$          | $1.1103 \times 10^{-30}$          | $7.3283 \times 10^{-48}$          |
| $10^{-11}$     | ~100              | $9.74 \times 10^{-14}$          | $1.1103 \times 10^{-28}$          | $7.3283 \times 10^{-45}$          |
| $10^{-10}$     | ~100              | $9.74 \times 10^{-13}$          | $1.1103 \times 10^{-26}$          | $7.3283 \times 10^{-42}$          |
| $10^{-9}$      | ~100              | $9.74 \times 10^{-12}$          | $1.1103 \times 10^{-24}$          | $7.3283 \times 10^{-39}$          |
| $10^{-8}$      | ~100              | $9.74 \times 10^{-11}$          | $1.1103 \times 10^{-22}$          | $7.3283 \times 10^{-36}$          |
| $10^{-7}$      | ~100              | $9.74 \times 10^{-10}$          | $1.1103 \times 10^{-20}$          | $7.3283 \times 10^{-33}$          |
| $10^{-6}$      | ~100              | $9.74 \times 10^{-9}$           | $1.1103 \times 10^{-18}$          | $7.3283 \times 10^{-30}$          |
| $10^{-5}$      | 99.9999           | $9.74 \times 10^{-8}$           | $1.1103 \times 10^{-16}$          | $7.3283 \times 10^{-27}$          |
| $10^{-4}$      | 99.9999           | $9.7399 \times 10^{-7}$         | $1.1103 \times 10^{-14}$          | $7.3283 \times 10^{-24}$          |
| $10^{-3}$      | 99.9999           | $9.7399 \times 10^{-6}$         | $1.1103 \times 10^{-12}$          | $7.33283 \times 10^{-21}$         |
| $10^{-2}$      | 99.9999           | $9.7399 \times 10^{-5}$         | $1.1103 \times 10^{-10}$          | $7.3283 \times 10^{-18}$          |
| $10^{-1}$      | 99.9990           | $9.7399 \times 10^{-4}$         | $1.1103 \times 10^{-8}$           | $7.3283 \times 10^{-15}$          |
| 1              | 99.9902           | $9.7390 \times 10^{-3}$         | $1.1102 \times 10^{-6}$           | $7.3276 \times 10^{-12}$          |
| 1.7            | 99.9834           | 0.01655                         | $3.2084 \times 10^{-6}$           | $3.5998 \times 10^{-11}$          |

**Table S9b.** The calculated relative abundance of  $(\text{BCl}_3)_n\text{HClO}_4$  clusters at different pressure of  $\text{BCl}_3$  and 200 K.

| Pressure (atm) | % $\text{HClO}_4$ | % $(\text{BCl}_3)\text{HClO}_4$ | % $(\text{BCl}_3)_2\text{HClO}_4$ | % $(\text{BCl}_3)_3\text{HClO}_4$ |
|----------------|-------------------|---------------------------------|-----------------------------------|-----------------------------------|
| $10^{-12}$     | ~100              | $1.0732 \times 10^{-13}$        | $6.4023 \times 10^{-29}$          | $3.9457 \times 10^{-45}$          |
| $10^{-11}$     | ~100              | $1.0732 \times 10^{-12}$        | $6.4023 \times 10^{-27}$          | $3.9457 \times 10^{-42}$          |
| $10^{-10}$     | ~100              | $1.0732 \times 10^{-11}$        | $6.4023 \times 10^{-25}$          | $3.9457 \times 10^{-39}$          |
| $10^{-9}$      | ~100              | $1.0732 \times 10^{-10}$        | $6.4023 \times 10^{-23}$          | $3.9457 \times 10^{-36}$          |
| $10^{-8}$      | ~100              | $1.0732 \times 10^{-9}$         | $6.4023 \times 10^{-21}$          | $3.9457 \times 10^{-33}$          |
| $10^{-7}$      | ~100              | $1.0732 \times 10^{-8}$         | $6.4023 \times 10^{-19}$          | $3.9457 \times 10^{-30}$          |
| $10^{-6}$      | ~100              | $1.0732 \times 10^{-7}$         | $6.4023 \times 10^{-17}$          | $3.9457 \times 10^{-27}$          |
| $10^{-5}$      | ~100              | $1.0732 \times 10^{-6}$         | $6.4023 \times 10^{-15}$          | $3.9457 \times 10^{-24}$          |
| $10^{-4}$      | 99.9999           | $1.0732 \times 10^{-5}$         | $6.4023 \times 10^{-13}$          | $3.9457 \times 10^{-21}$          |
| $10^{-3}$      | 99.9998           | $1.0732 \times 10^{-4}$         | $6.4023 \times 10^{-11}$          | $3.9457 \times 10^{-18}$          |
| $10^{-2}$      | 99.9989           | $1.0732 \times 10^{-3}$         | $6.4023 \times 10^{-9}$           | $3.9457 \times 10^{-15}$          |
| $10^{-1}$      | 99.9892           | $1.0731 \times 10^{-2}$         | $6.4017 \times 10^{-7}$           | $3.9453 \times 10^{-12}$          |
| 1              | 99.8927           | 0.10721                         | $6.3955 \times 10^{-5}$           | $3.9414 \times 10^{-9}$           |
| 1.7            | 99.8177           | 0.1821                          | $1.8469 \times 10^{-4}$           | $1.9349 \times 10^{-8}$           |

**Table S10a.** The calculated relative abundance of  $(\text{BBr}_3)_n\text{HClO}_4$  clusters at different pressure of  $\text{BBr}_3$  and 298 K.

| Pressure (atm) | % $\text{HClO}_4$ | % $(\text{BBr}_3)\text{HClO}_4$ | % $(\text{BBr}_3)_2\text{HClO}_4$ | % $(\text{BBr}_3)_3\text{HClO}_4$ |
|----------------|-------------------|---------------------------------|-----------------------------------|-----------------------------------|
| $10^{-12}$     | ~100              | $4.11 \times 10^{-14}$          | $1.6809 \times 10^{-29}$          | $1.5818 \times 10^{-45}$          |
| $10^{-11}$     | ~100              | $4.11 \times 10^{-13}$          | $1.6809 \times 10^{-27}$          | $1.5818 \times 10^{-42}$          |
| $10^{-10}$     | ~100              | $4.11 \times 10^{-12}$          | $1.6809 \times 10^{-25}$          | $1.5818 \times 10^{-39}$          |
| $10^{-9}$      | ~100              | $4.11 \times 10^{-11}$          | $1.6809 \times 10^{-23}$          | $1.5818 \times 10^{-36}$          |
| $10^{-8}$      | ~100              | $4.11 \times 10^{-10}$          | $1.6809 \times 10^{-21}$          | $1.5818 \times 10^{-33}$          |
| $10^{-7}$      | ~100              | $4.11 \times 10^{-9}$           | $1.6809 \times 10^{-19}$          | $1.5818 \times 10^{-30}$          |
| $10^{-6}$      | ~100              | $4.11 \times 10^{-8}$           | $1.6809 \times 10^{-17}$          | $1.5818 \times 10^{-27}$          |
| $10^{-5}$      | ~100              | $4.11 \times 10^{-7}$           | $1.6809 \times 10^{-15}$          | $1.5818 \times 10^{-24}$          |
| $10^{-4}$      | 99.9999           | $4.1099 \times 10^{-6}$         | $1.6809 \times 10^{-13}$          | $1.5818 \times 10^{-21}$          |
| $10^{-3}$      | 99.9999           | $4.1099 \times 10^{-5}$         | $1.6809 \times 10^{-11}$          | $1.5818 \times 10^{-18}$          |
| $10^{-2}$      | 99.9995           | $4.1099 \times 10^{-4}$         | $1.6809 \times 10^{-9}$           | $1.5818 \times 10^{-15}$          |
| $10^{-1}$      | 99.9958           | $4.1098 \times 10^{-3}$         | $1.6809 \times 10^{-7}$           | $1.5817 \times 10^{-12}$          |
| 0.13           | 99.9946           | $5.3427 \times 10^{-3}$         | $2.8407 \times 10^{-7}$           | $3.4750 \times 10^{-12}$          |
| 1              | 99.9589           | 0.041083                        | $1.6803 \times 10^{-5}$           | $1.5811 \times 10^{-9}$           |

**Table S10b.** The calculated relative abundance of  $(\text{BBr}_3)_n\text{HClO}_4$  clusters at different pressure of  $\text{BBr}_3$  and 200 K.

| Pressure (atm) | % $\text{HClO}_4$ | % $(\text{BBr}_3)\text{HClO}_4$ | % $(\text{BBr}_3)_2\text{HClO}_4$ | % $(\text{BBr}_3)_3\text{HClO}_4$ |
|----------------|-------------------|---------------------------------|-----------------------------------|-----------------------------------|
| $10^{-12}$     | ~100              | $6.8495 \times 10^{-13}$        | $8.3325 \times 10^{-27}$          | $1.8195 \times 10^{-41}$          |
| $10^{-11}$     | ~100              | $6.8495 \times 10^{-12}$        | $8.3325 \times 10^{-25}$          | $1.8195 \times 10^{-38}$          |
| $10^{-10}$     | ~100              | $6.8495 \times 10^{-11}$        | $8.3325 \times 10^{-23}$          | $1.8195 \times 10^{-35}$          |
| $10^{-9}$      | ~100              | $6.8495 \times 10^{-10}$        | $8.3325 \times 10^{-21}$          | $1.8195 \times 10^{-32}$          |
| $10^{-8}$      | ~100              | $6.8495 \times 10^{-9}$         | $8.3325 \times 10^{-19}$          | $1.8195 \times 10^{-29}$          |
| $10^{-7}$      | ~100              | $6.8495 \times 10^{-8}$         | $8.3325 \times 10^{-17}$          | $1.8195 \times 10^{-26}$          |
| $10^{-6}$      | ~100              | $6.8495 \times 10^{-7}$         | $8.3325 \times 10^{-15}$          | $1.8195 \times 10^{-23}$          |
| $10^{-5}$      | 99.9999           | $6.8495 \times 10^{-6}$         | $8.3325 \times 10^{-13}$          | $1.8195 \times 10^{-20}$          |
| $10^{-4}$      | 99.9999           | $6.8495 \times 10^{-5}$         | $8.3325 \times 10^{-11}$          | $1.8195 \times 10^{-17}$          |
| $10^{-3}$      | 99.9993           | $6.8494 \times 10^{-4}$         | $8.3325 \times 10^{-9}$           | $1.8195 \times 10^{-14}$          |
| $10^{-2}$      | 99.9931           | $6.8490 \times 10^{-3}$         | $8.3319 \times 10^{-7}$           | $1.8194 \times 10^{-11}$          |
| $10^{-1}$      | 99.9314           | $6.8448 \times 10^{-2}$         | $8.3268 \times 10^{-5}$           | $1.8183 \times 10^{-8}$           |
| 0.13           | 99.9108           | 0.08896                         | $1.4069 \times 10^{-4}$           | $3.9940 \times 10^{-8}$           |
| 1              | 99.3114           | 0.6802                          | $8.2751 \times 10^{-3}$           | $1.8070 \times 10^{-5}$           |

**Table S11a.** The calculated relative abundance of  $(\text{B}(\text{OH})_3)_n\text{HClO}_4$  clusters at different pressure of  $\text{B}(\text{OH})_3$  and 298 K.

| Pressure (atm)     | % $\text{HClO}_4$ | % $(\text{B}(\text{OH})_3)\text{HClO}_4$ | % $(\text{B}(\text{OH})_3)_2\text{HClO}_4$ | % $(\text{B}(\text{OH})_3)_3\text{HClO}_4$ |
|--------------------|-------------------|------------------------------------------|--------------------------------------------|--------------------------------------------|
| $10^{-12}$         | ~100              | $9.29 \times 10^{-10}$                   | $2.1645 \times 10^{-21}$                   | $8.7881 \times 10^{-34}$                   |
| $10^{-11}$         | ~100              | $9.29 \times 10^{-9}$                    | $2.1645 \times 10^{-19}$                   | $8.7881 \times 10^{-31}$                   |
| $10^{-10}$         | ~100              | $9.29 \times 10^{-8}$                    | $2.1645 \times 10^{-17}$                   | $8.7881 \times 10^{-28}$                   |
| $2 \times 10^{-9}$ | ~100              | $1.8579 \times 10^{-6}$                  | $8.6582 \times 10^{-15}$                   | $7.0305 \times 10^{-24}$                   |
| $10^{-8}$          | ~100              | $9.29 \times 10^{-6}$                    | $2.1645 \times 10^{-13}$                   | $8.7881 \times 10^{-22}$                   |
| $10^{-7}$          | 99.9999           | $9.2899 \times 10^{-5}$                  | $2.1645 \times 10^{-11}$                   | $8.7881 \times 10^{-19}$                   |
| $10^{-6}$          | 99.9999           | $9.2899 \times 10^{-4}$                  | $2.1645 \times 10^{-9}$                    | $8.7880 \times 10^{-16}$                   |
| $10^{-5}$          | 99.9907           | $9.2891 \times 10^{-3}$                  | $2.1643 \times 10^{-7}$                    | $8.7873 \times 10^{-13}$                   |
| $10^{-4}$          | 99.9071           | 0.09281                                  | $2.1625 \times 10^{-5}$                    | $8.7799 \times 10^{-10}$                   |
| $10^{-3}$          | 99.0774           | 0.9204                                   | $2.1446 \times 10^{-3}$                    | $8.7070 \times 10^{-7}$                    |
| $10^{-2}$          | 91.3180           | 8.4834                                   | 0.1976                                     | $8.0251 \times 10^{-4}$                    |
| $10^{-1}$          | 46.4199           | 43.1241                                  | 10.0479                                    | 0.4079                                     |
| 1                  | 2.4555            | 22.8122                                  | 53.1524                                    | 21.5798                                    |

**Table S11b.** The calculated relative abundance of  $(\text{B}(\text{OH})_3)_n\text{HClO}_4$  clusters at different pressure of  $\text{B}(\text{OH})_3$  and 200 K.

| Pressure (atm)      | % $\text{HClO}_4$        | % $(\text{B}(\text{OH})_3)\text{HClO}_4$ | % $(\text{B}(\text{OH})_3)_2\text{HClO}_4$ | % $(\text{B}(\text{OH})_3)_3\text{HClO}_4$ |
|---------------------|--------------------------|------------------------------------------|--------------------------------------------|--------------------------------------------|
| $2 \times 10^{-19}$ | ~100                     | $3.8152 \times 10^{-12}$                 | $8.2309 \times 10^{-27}$                   | $3.9666 \times 10^{-42}$                   |
| $10^{-12}$          | ~100                     | $1.9076 \times 10^{-5}$                  | $2.0577 \times 10^{-13}$                   | $4.9583 \times 10^{-22}$                   |
| $10^{-11}$          | 99.9998                  | $1.9076 \times 10^{-4}$                  | $2.0577 \times 10^{-11}$                   | $4.9583 \times 10^{-19}$                   |
| $10^{-10}$          | 99.9981                  | $1.9075 \times 10^{-3}$                  | $2.0577 \times 10^{-9}$                    | $4.9582 \times 10^{-16}$                   |
| $2 \times 10^{-9}$  | 99.9618                  | $3.8138 \times 10^{-2}$                  | $8.2278 \times 10^{-7}$                    | $3.9651 \times 10^{-12}$                   |
| $10^{-8}$           | 99.8095                  | 0.19040                                  | $2.0538 \times 10^{-5}$                    | $4.9488 \times 10^{-10}$                   |
| $10^{-7}$           | 98.1261                  | 1.8718                                   | $2.0191 \times 10^{-3}$                    | $4.8654 \times 10^{-7}$                    |
| $10^{-6}$           | 83.8345                  | 15.9925                                  | 0.1725                                     | $4.1567 \times 10^{-4}$                    |
| $10^{-5}$           | 32.0681                  | 61.1741                                  | 6.5987                                     | 0.1590                                     |
| $10^{-4}$           | 2.1924                   | 41.8230                                  | 45.1138                                    | 10.8706                                    |
| $10^{-3}$           | $1.3873 \times 10^{-2}$  | 2.6466                                   | 28.5486                                    | 68.7808                                    |
| $10^{-2}$           | $1.9357 \times 10^{-5}$  | $3.6926 \times 10^{-2}$                  | 3.9832                                     | 95.9798                                    |
| $10^{-1}$           | $2.0084 \times 10^{-8}$  | $3.8314 \times 10^{-4}$                  | 0.4133                                     | 99.5863                                    |
| 1                   | $2.0159 \times 10^{-11}$ | $3.8457 \times 10^{-6}$                  | $4.1483 \times 10^{-2}$                    | 99.9585                                    |
